# Supplementary material for: Sulfuric acid–dimethylamine particle formation enhanced by functional organic acids: an integrated experimental and theoretical study
Source: Royal Society of Chemistry journal article supplement (doi:10.1039/d2cp01671k), 2022-01-01
Supplement: d2cp01671k1.pdf [file d2cp01671k1.pdf]

1  
2  
3  
4  
5  
6  
7  
8  
9  
10  
11  
12  
13  
14  
15  
16  
17  
18

## Supplementary Information

### **Sulfuric acid-dimethylamine particle formation enhanced by functional organic acids: an integrated experimental and theoretical study**

Chunyu Wang,<sup>a,b</sup> Yirong Liu,<sup>a</sup> Teng Huang,<sup>c</sup> Yajuan Feng,<sup>a</sup> Zhongquan Wang,<sup>d</sup> Runqi Lu,<sup>a</sup> and Shuai Jiang<sup>\*a</sup>

<sup>a</sup> *School of Information Science and Technology, University of Science and Technology of China, Hefei, Anhui 230026, China*

<sup>b</sup> *School of Chemistry and Material Engineering, Chaohu University, Hefei, Anhui 238024, China*

<sup>c</sup> *Laboratory of Atmospheric Physico-Chemistry, Anhui Institute of Optics & Fine Mechanics, Chinese Academy of Sciences, Hefei, Anhui 230031, China*

<sup>d</sup> *Department of Physics, Huainan Normal University, Huainan, Anhui, 232001, China*

<sup>\*</sup>*Correspondence: Shuai Jiang (shuaijiang@ustc.edu.cn)*

|    |                                                                                  |     |
|----|----------------------------------------------------------------------------------|-----|
| 19 | Table S1. Particulate and gas phase concentrations of three organic acids.....   | S3  |
| 20 | Table S2. The functional groups, solubility, acidity of three organic acids..... | S3  |
| 21 | Text S1. TFT system stability .....                                              | S3  |
| 22 | Figure S1. The particles number plotted versus time during the experiment.....   | S4  |
| 23 | Text S2. The concentration ratio of MA dimer to monomer.....                     | S4  |
| 24 | Table S3. Concentration ratios between MA dimers and monomers at 283 K. ....     | S5  |
| 25 | Table S4. $\Delta E$ , $\Delta G$ and rate constants for dimers formation. ....  | S5  |
| 26 | Text S3. Proton transfer and LBO analysis .....                                  | S6  |
| 27 | Table S5. Proton-transfer parameter and the LBO between in the clusters. ....    | S7  |
| 28 | Table S6. Cartesian coordinates of all optimized molecules and clusters.....     | S8  |
| 29 | Reference .....                                                                  | S22 |
| 30 |                                                                                  |     |

31 **Table S1.** Particulate and gas phase concentrations ( $\text{ng}\cdot\text{m}^{-3}$  and ppbv, respectively) of  
 32 pyruvic, succinic, and malic acids in different global regions.

| Organics             | Location                                  | Sampling time    | Size              | Concentration ( $\text{ng}\cdot\text{m}^{-3}$ ) | References             |
|----------------------|-------------------------------------------|------------------|-------------------|-------------------------------------------------|------------------------|
| <b>Pyruvic acid</b>  | <sup>1</sup> China, Beijing (urban)       | 2017 Winter      | PM <sub>2.5</sub> | 37-405                                          | Yu et al. (2021)       |
|                      | <sup>2</sup> China, Chengdu (urban)       | 2012 Winter      | PM <sub>2.5</sub> | 41.3-189                                        | Li et al. (2015)       |
|                      | <sup>3</sup> China, Mt. Tai (Mountainous) | 2006 Late spring | TSP               | 3.0-140                                         | Kawamura et al. (2013) |
|                      | <sup>4</sup> India, Raipur (urban)        | 2012-2013 Winter | PM <sub>2.1</sub> | 6.6-24.1                                        | Deshmukh et al. (2016) |
|                      | <sup>5</sup> Canada, Alert (arctic)       | 1987-1988        | TSP               | 0.0-0.5                                         | Kawamura et al. (1996) |
|                      | <sup>6</sup> USA, Colorado (semi-rural)   | 2014 Summer      | Gas-phase         | BDL-0.51                                        | Mattila et al. (2018)  |
| <b>Succinic acid</b> | China, Beijing (urban)                    | 2017 Winter      | PM <sub>2.5</sub> | 42.5-132.5                                      | Yu et al. (2021)       |
|                      | China, Chengdu (urban)                    | 2012 Winter      | PM <sub>2.5</sub> | 197-636                                         | Li et al. (2015)       |
|                      | China, Mt. Tai (Mountainous)              | 2006 Late spring | TSP               | 7.0-829                                         | Kawamura et al. (2013) |
|                      | India, Raipur (urban)                     | 2012-2013 Winter | PM <sub>2.1</sub> | 77.4-175                                        | Deshmukh et al. (2016) |
|                      | Canada, Alert (arctic)                    | 1987-1988        | TSP               | 0.5-18                                          | Kawamura et al. (1996) |
| <b>Malic acid</b>    | China, Beijing (urban)                    | 2017 Winter      | PM <sub>2.5</sub> | 4.4-117.6                                       | Yu et al. (2021)       |
|                      | China, Chengdu (urban)                    | 2012 Winter      | PM <sub>2.5</sub> | 7.5-18.5                                        | Li et al. (2015)       |
|                      | China, Mt. Tai (Mountainous)              | 2006 Late spring | TSP               | 0.0-43.9                                        | Kawamura et al. (2013) |
|                      | India, Raipur (urban)                     | 2012-2013 Winter | PM <sub>2.1</sub> | 0.9-3.8                                         | Deshmukh et al. (2016) |
|                      | Canada, Alert (arctic)                    | 1987-1988        | TSP               | 0.0-0.6                                         | Kawamura et al. (1996) |

33 TSP = total suspended particles and BDL = below detection limit

34 **Table S2.** The functional groups, solubility, acidity, saturation vapor pressures ( $P_s^0$ ) and  
 35 enthalpies of vaporization ( $\Delta H_{\text{vap}}$ ) or sublimation ( $\Delta H_{\text{sub}}$ ) of three organic acids. The  
 36 solubility and saturation vapor pressures were measured at 298 K.

| Organic Compounds | Functional groups | Solubility ( $\text{g L}^{-1}$ ) | pK <sub>a</sub> <sup>c</sup> | $P_s^0$ (298K, Pa)                | $\Delta H_{\text{sub}}$ ( $\text{kJ mol}^{-1}$ ) |
|-------------------|-------------------|----------------------------------|------------------------------|-----------------------------------|--------------------------------------------------|
| Pyruvic acid      | =O, -COOH         | $2.74 \times 10^7$ <sup>a</sup>  | 2.5                          | /                                 | $51.4$ ( $\Delta H_{\text{vap}}$ ) <sup>e</sup>  |
| Succinic acid     | -COOH, COOH       | $71$ <sup>b</sup>                | 4.2, 5.6                     | $7.7 \times 10^{-5}$ <sup>d</sup> | $115$ <sup>d</sup>                               |
| Malic acid        | -OH, -COOH        | $590$ <sup>b</sup>               | 3.4, 5.2                     | $6.4 \times 10^{-5}$ <sup>d</sup> | $81$ <sup>d</sup>                                |

37 <sup>a</sup>data are obtained from reference 7<sup>7</sup>

38 <sup>b</sup>data are obtained from reference 8<sup>8</sup>

39 <sup>c</sup>data are obtained from reference 9<sup>9</sup>

40 <sup>d</sup>data are obtained from reference 10<sup>10</sup>

41 <sup>e</sup>data are obtained from reference 11<sup>11</sup>

## 42 **Text S1. TFT system stability**

43 Typical experiments are depicted in Fig. S1 where total particle number  
 44 concentrations are plotted as a function of time. For increasing H<sub>2</sub>SO<sub>4</sub> concentration in SA-  
 45 W system (Fig. S1 (A)), the particle production started to be stable rapidly in one to several  
 46 minutes depending on different condition. The particle changed a little after added

47 pyruvic acid into SA-DMA-W system shown in Fig. S1 (B), the particle production started  
 48 to be highest and then decreased to be stable in several minutes for increasing H<sub>2</sub>SO<sub>4</sub>  
 49 concentration, and stabilized extremely quickly for decreasing H<sub>2</sub>SO<sub>4</sub> concentration. Then,  
 50 the stable particle production lasts for several minutes to be assessed and subsequently  
 51 averaged to obtain one experimental point.

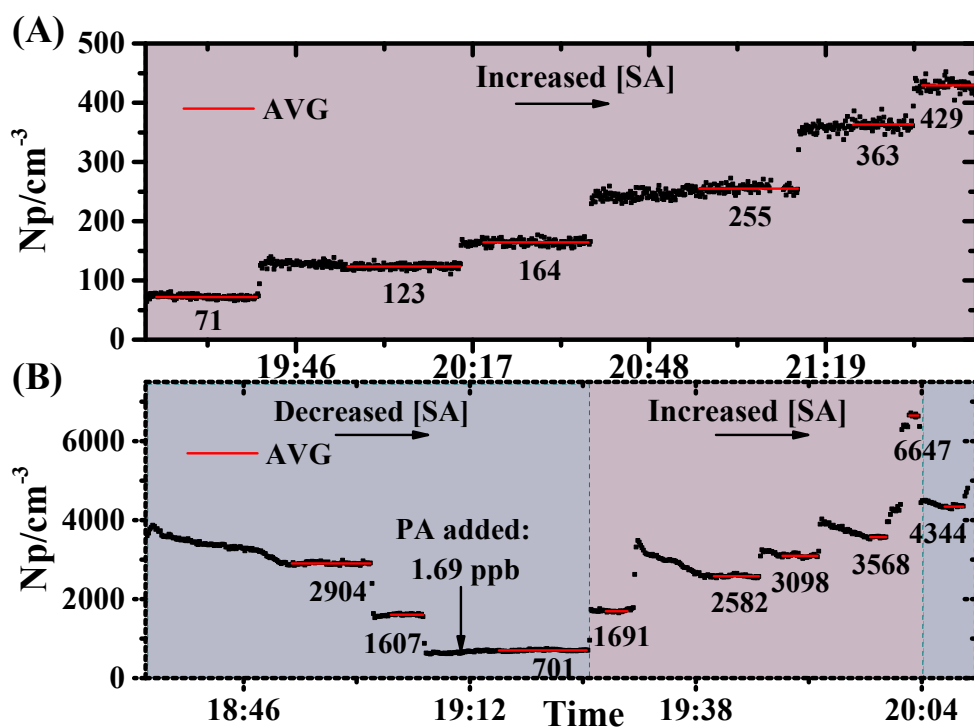

52  
 53 **Figure S1.** The particles number plotted versus time during the experiment at 283 K and  
 54 30% RH. (A) Changing sulfuric acid concentration ([SA]) to stability for sulfuric acid-  
 55 water system. (B) Addition/changing acid concentration for sulfuric acid-dimethylamine-  
 56 water system and pyruvic acid-added system.

57 **Text S2. The concentration ratio of MA dimer to monomer**

58 To evaluate the formation of gas-phase dicarboxylic acid dimer, the MA dimer

59 number concentration ( $[MA_2]$ ) was computed from the monomer number concentration as  
 60  $K_{eq} \times [MA]^2$ , with  $K_{eq} = (c_{ref})^{-1} \exp(-\Delta G_{dimer}/RT)$ , where  $c_{ref} = p^0/(k_b T)$  is the concentration  
 61 of the reference vapor at which the  $\Delta G_{dimer}$  is computed. Table S3 shows the concentration  
 62 ratios at different MA monomer concentrations at 283 K and 1 atm.

63 **Table S3.** Concentration ratios between MA dimer and monomer at 283 K, calculated at  
 64 the DLPNO-CCSD(T)/aug-cc-pVTZ//M06-2X/6-311+G(2d,p) level of theory.

| for $2MA \rightleftharpoons (MA)_2$ |                                      | Percentage of $P_g^{283K}$ <sup>a</sup> | [MA] (molecule $cm^{-3}$ ) | [(MA) <sub>2</sub> ]/[MA] |
|-------------------------------------|--------------------------------------|-----------------------------------------|----------------------------|---------------------------|
| $\Delta G$ (kcal $mol^{-1}$ )       | $K_{eq}$ ( $cm^3$ molecule $^{-1}$ ) |                                         |                            |                           |
| -7.44                               | $2.61 \times 10^{-14}$               | 10%                                     | $2.88 \times 10^8$         | $7.51 \times 10^{-6}$     |
|                                     |                                      | 50%                                     | $1.44 \times 10^9$         | $3.76 \times 10^{-5}$     |
|                                     |                                      | 100%                                    | $2.88 \times 10^9$         | $7.51 \times 10^{-5}$     |

65 <sup>a</sup>data are obtained from reference 10<sup>10</sup>

66 **Table S4.** Binding energies ( $\Delta E$ ), Gibbs free energy changes ( $\Delta G$ ), rate constants predicted  
 67 with collision model ( $k$ ), and permanent dipole moment ( $d$ ) for dimers formation calculated  
 68 at the DLPNO-CCSD(T)/aug-cc-pVTZ//M06-2X/6-311+G(2d,p) level of theory and at  
 69 283 K.

| X                                                         | $\Delta E$ (kcal $mol^{-1}$ ) | $\Delta G$ (kcal $mol^{-1}$ ) | $k$ ( $10^{-10}$<br>$cm^3$ molecule $^{-1}$ s $^{-1}$ ) | $d$ of Product<br>(debye) |
|-----------------------------------------------------------|-------------------------------|-------------------------------|---------------------------------------------------------|---------------------------|
| <b>SA + X <math>\rightleftharpoons</math> (SA)(X)</b>     |                               |                               |                                                         |                           |
| SA                                                        | -17.74                        | -5.83                         | 3.66                                                    | 3.82                      |
| DMA                                                       | -23.83                        | -12.55                        | 5.27                                                    | 8.98                      |
| W                                                         | -12.68                        | -2.36                         | 4.64                                                    | 2.99                      |
| PA                                                        | -12.83                        | -1.40                         | 4.78                                                    | 2.13                      |
| MOA                                                       | -18.29                        | -7.29                         | 5.14                                                    | 4.90                      |
| SUA                                                       | -18.14                        | -6.48                         | 6.45                                                    | 4.13                      |
| MA                                                        | -23.46                        | -9.88                         | 5.81                                                    | 7.15                      |
| TA                                                        | -17.83                        | -7.56                         | 5.45                                                    | 3.96                      |
| GA                                                        | -24.04                        | -12.75                        | 7.35                                                    | 3.84                      |
| <b>X + (DMA) <math>\rightleftharpoons</math> (X)(DMA)</b> |                               |                               |                                                         |                           |
| PA                                                        | -11.98                        | -1.70                         | 6.71                                                    | 4.27                      |
| MOA                                                       | -14.44                        | -3.20                         | 7.28                                                    | 3.83                      |
| SUA                                                       | -15.07                        | -2.47                         | 9.12                                                    | 1.80                      |
| MA                                                        | -15.89                        | -4.44                         | 8.34                                                    | 5.85                      |
| TA                                                        | -16.08                        | -5.13                         | 7.92                                                    | 4.28                      |
| GA                                                        | -20.67                        | -6.37                         | 10.42                                                   | 2.75                      |

### 70 Text S3. Proton transfer and LBO analysis

71 According to the proton transfer parameter  $\rho_{PT}$  (Hunt et al., 2003; Kurnig and  
72 Scheiner, 1987), the degree of proton transfer in the hydrogen bond is discussed, and the  
73 degree of ionization is evaluated according to the distance between atoms. The formula is  
74 as follows:

$$75 \quad \rho_{PT} = (r_{OH} - r_{OH}^0) - (r_{H\dots N} - r_{H\dots N}^0) \quad (1)$$

76 where,  $r_{OH}$  and  $r_{OH}^0$  are the O-H distance in OA or SA of cluster and in the free monomer,  
77 respectively.  $r_{H\dots N}$  and  $r_{H\dots N}^0$  are the hydrogen bond distances in the clusters and the H-N  
78 distances in fully protonated DMA, respectively. As shown in Table S5, the  $\rho_{PT}$  in  
79 (SA)<sub>2</sub>(DMA) and (OA)(SA)(DMA) clusters are positive indicating the cluster with protons  
80 completely transferred to dimethylamine. Thus, proton transfer converts the N-H hydrogen  
81 bonding to a covalent bond, leading to the formation of the dimethylamine bisulfate ion  
82 pair in the (OA)(SA)(DMA) clusters. The formation of N-H covalent bond was also  
83 confirmed by LBO values in (SA)(DMA) cluster and these with OA or SA addition, as  
84 depicted in Table S5. The LBO values of N-H covalent bond in all (OA)(SA)(DMA)  
85 clusters are higher than that of (SA)(DMA), which indicates addition of OA strengthens the  
86 preexisting covalent bonds.

87

88 **Table S5.** The proton-transfer parameter ( $\rho_{PT}$  in Å), the total number of proton transfers  
 89 (N), and the Laplacian bond order (LBO in a.u.) of the newly formed nitrogen-hydrogen  
 90 covalent bond in the clusters.

| <b>Clusters</b>         | $r_{OH}$ | $r_{N-H}$ | $\rho_{PT}$ | <b>LBO</b> | <b>N</b>  |
|-------------------------|----------|-----------|-------------|------------|-----------|
| (SA)(DMA)               | 1.460    | 1.106     | 0.399       | 0.366      | 1(SA)     |
| (SA) <sub>2</sub> (DMA) | 1.815    | 1.033     | 0.827       | 0.602      | 1(SA)     |
| (SA)(PA)(DMA)           | 1.757    | 1.038     | 0.760       | 0.586      | 2(PA, SA) |
| (SA)(MOA)(DMA)          | 2.189    | 1.029     | 1.205       | 0.616      | 1(MOA)    |
| (SA)(SUA)(DMA)          | 1.534    | 1.078     | 0.502       | 0.445      | 1(SA)     |
| (SA)(MA)(DMA)           | 1.694    | 1.045     | 0.694       | 0.555      | 2(SA, MA) |
| (SA)(TA)(DMA)           | 1.780    | 1.035     | 0.845       | 0.592      | 2(SA, TA) |
| (SA)(GA)(DMA)           | 1.859    | 1.037     | 0.867       | 0.588      | 1(SA)     |

91

92 **Table S6.** Cartesian coordinates (in Å) of all optimized molecules and clusters.

|     | Atmos             | X               | Y               | Z               |
|-----|-------------------|-----------------|-----------------|-----------------|
| 93  | SA                |                 |                 |                 |
| 94  | S                 | 0.000029000000  | 0.000121000000  | -0.158793000000 |
| 95  | O                 | 0.665675000000  | -1.063976000000 | -0.821141000000 |
| 96  | O                 | -0.664876000000 | 1.065610000000  | -0.819645000000 |
| 97  | O                 | -1.022927000000 | -0.686827000000 | 0.840425000000  |
| 98  | O                 | 1.022185000000  | 0.685212000000  | 0.842506000000  |
| 99  | H                 | -1.688675000000 | -0.033684000000 | 1.101085000000  |
| 100 | H                 | 1.687748000000  | 0.031588000000  | 1.102437000000  |
| 101 |                   |                 |                 |                 |
| 102 | DMA               |                 |                 |                 |
| 103 | C                 | -0.026944000000 | -0.224033000000 | 1.204850000000  |
| 104 | N                 | -0.026944000000 | 0.589628000000  | 0.000000000000  |
| 105 | C                 | -0.026944000000 | -0.224033000000 | -1.204850000000 |
| 106 | H                 | 0.029053000000  | 0.416428000000  | 2.085079000000  |
| 107 | H                 | 0.798251000000  | -0.950916000000 | 1.244120000000  |
| 108 | H                 | -0.964643000000 | -0.781658000000 | 1.257343000000  |
| 109 | H                 | 0.786622000000  | 1.193300000000  | 0.000000000000  |
| 110 | H                 | 0.029053000000  | 0.416428000000  | -2.085079000000 |
| 111 | H                 | -0.964643000000 | -0.781658000000 | -1.257343000000 |
| 112 | H                 | 0.798251000000  | -0.950916000000 | -1.244120000000 |
| 113 |                   |                 |                 |                 |
| 114 | W                 |                 |                 |                 |
| 115 | O                 | 0.000000000000  | 0.000000000000  | 0.116481000000  |
| 116 | H                 | 0.000000000000  | 0.763464000000  | -0.465925000000 |
| 117 | H                 | 0.000000000000  | -0.763464000000 | -0.465925000000 |
| 118 |                   |                 |                 |                 |
| 119 | (SA) <sub>2</sub> |                 |                 |                 |
| 120 | S                 | 1.976802000000  | -0.002559000000 | 0.110418000000  |
| 121 | O                 | 1.061294000000  | -0.203443000000 | 1.210679000000  |
| 122 | O                 | 3.364138000000  | 0.067395000000  | 0.347450000000  |
| 123 | O                 | 1.728382000000  | -1.132276000000 | -0.952924000000 |
| 124 | O                 | 1.555244000000  | 1.306897000000  | -0.647537000000 |
| 125 | H                 | 0.775683000000  | -1.180987000000 | -1.158679000000 |
| 126 | H                 | 0.599400000000  | 1.276001000000  | -0.843761000000 |
| 127 | S                 | -1.938243000000 | -0.075222000000 | -0.107167000000 |
| 128 | O                 | -0.885050000000 | -0.072771000000 | -1.094076000000 |
| 129 | O                 | -3.252547000000 | -0.491427000000 | -0.425940000000 |
| 130 | O                 | -1.465179000000 | -0.870382000000 | 1.135265000000  |
| 131 | O                 | -1.949758000000 | 1.426680000000  | 0.396294000000  |
| 132 | H                 | -0.492708000000 | -0.688314000000 | 1.281401000000  |
| 133 | H                 | -2.751524000000 | 1.592425000000  | 0.915326000000  |
| 134 |                   |                 |                 |                 |
| 135 | (SA)(W)           |                 |                 |                 |



|     |                         |                 |                 |                 |
|-----|-------------------------|-----------------|-----------------|-----------------|
| 136 | S                       | 0.578769000000  | -0.068624000000 | 0.131227000000  |
| 137 | O                       | -0.217148000000 | 0.364775000000  | 1.237408000000  |
| 138 | O                       | 1.756968000000  | -0.846471000000 | 0.293285000000  |
| 139 | O                       | -0.335934000000 | -0.803571000000 | -0.896046000000 |
| 140 | O                       | 0.967059000000  | 1.267019000000  | -0.637732000000 |
| 141 | H                       | -1.284378000000 | -0.520738000000 | -0.744751000000 |
| 142 | H                       | 1.716588000000  | 1.079572000000  | -1.220927000000 |
| 143 | O                       | -2.670846000000 | 0.094683000000  | -0.117309000000 |
| 144 | H                       | -2.295053000000 | 0.417331000000  | 0.714598000000  |
| 145 | H                       | -3.398252000000 | -0.489653000000 | 0.114596000000  |
| 146 |                         |                 |                 |                 |
| 147 | (SA)(DMA)               |                 |                 |                 |
| 148 | S                       | -1.270827000000 | -0.175350000000 | 0.059219000000  |
| 149 | O                       | -0.574293000000 | 0.060312000000  | 1.311436000000  |
| 150 | O                       | -2.501363000000 | -0.908588000000 | 0.083311000000  |
| 151 | O                       | -1.646239000000 | 1.326500000000  | -0.421594000000 |
| 152 | O                       | -0.315071000000 | -0.657424000000 | -0.976980000000 |
| 153 | H                       | -2.400183000000 | 1.253070000000  | -1.020699000000 |
| 154 | H                       | 1.015904000000  | -0.428880000000 | -0.422397000000 |
| 155 | C                       | 3.101826000000  | -0.893366000000 | -0.140133000000 |
| 156 | N                       | 1.893046000000  | -0.115490000000 | 0.173602000000  |
| 157 | C                       | 2.036484000000  | 1.343056000000  | -0.016366000000 |
| 158 | H                       | 2.897708000000  | -1.949372000000 | 0.020683000000  |
| 159 | H                       | 3.928784000000  | -0.573620000000 | 0.492727000000  |
| 160 | H                       | 3.359011000000  | -0.729990000000 | -1.184994000000 |
| 161 | H                       | 1.555128000000  | -0.288073000000 | 1.123661000000  |
| 162 | H                       | 1.087641000000  | 1.808767000000  | 0.243133000000  |
| 163 | H                       | 2.267866000000  | 1.533239000000  | -1.062749000000 |
| 164 | H                       | 2.835926000000  | 1.724345000000  | 0.617525000000  |
| 165 |                         |                 |                 |                 |
| 166 | (SA) <sub>2</sub> (DMA) |                 |                 |                 |
| 167 | S                       | -2.233914000000 | 0.142064000000  | 0.046894000000  |
| 168 | O                       | -1.231338000000 | 1.073994000000  | -0.433576000000 |
| 169 | O                       | -3.563691000000 | 0.585309000000  | 0.242929000000  |
| 170 | O                       | -2.275451000000 | -1.068536000000 | -0.935564000000 |
| 171 | O                       | -1.708527000000 | -0.472004000000 | 1.379355000000  |
| 172 | H                       | -1.363532000000 | -1.450083000000 | -1.014623000000 |
| 173 | H                       | -0.709295000000 | -0.580783000000 | 1.331263000000  |
| 174 | S                       | 1.320843000000  | -1.307464000000 | -0.121663000000 |
| 175 | O                       | 2.136531000000  | -0.453845000000 | -0.963999000000 |
| 176 | O                       | 0.232888000000  | -2.014374000000 | -0.778334000000 |
| 177 | O                       | 2.341151000000  | -2.433188000000 | 0.357032000000  |
| 178 | O                       | 0.872953000000  | -0.602870000000 | 1.094782000000  |
| 179 | H                       | 1.832069000000  | -3.188031000000 | 0.683537000000  |
| 180 | H                       | 0.375858000000  | 1.631303000000  | 0.198658000000  |
| 181 | C                       | 1.133938000000  | 3.064510000000  | -1.053858000000 |

|     |           |                 |                 |                   |
|-----|-----------|-----------------|-----------------|-------------------|
| 182 | N         | 1.310275000000  | 1.994828000000  | -0.048772000000   |
| 183 | C         | 2.055670000000  | 2.397152000000  | 1.162277000000    |
| 184 | H         | 0.545809000000  | 2.664258000000  | -1.875966000000   |
| 185 | H         | 2.110996000000  | 3.389181000000  | -1.405404000000   |
| 186 | H         | 0.604698000000  | 3.897193000000  | -0.595047000000   |
| 187 | H         | 1.770693000000  | 1.164016000000  | -0.479222000000   |
| 188 | H         | 2.119167000000  | 1.533256000000  | 1.819253000000    |
| 189 | H         | 1.525737000000  | 3.211095000000  | 1.653128000000    |
| 190 | H         | 3.051232000000  | 2.725343000000  | 0.870637000000    |
| 191 |           |                 |                 |                   |
| 192 | PA        |                 |                 |                   |
| 193 | O         | -0.981156000000 | -1.455401000000 | -0.000138000000   |
| 194 | C         | -0.762488000000 | -0.282121000000 | -0.000057000000   |
| 195 | C         | 0.672955000000  | 0.290441000000  | -0.000379000000   |
| 196 | O         | -1.700859000000 | 0.656315000000  | 0.000630000000    |
| 197 | C         | 1.787026000000  | -0.700225000000 | 0.000155000000    |
| 198 | O         | 0.799395000000  | 1.488016000000  | -0.000467000000   |
| 199 | H         | -1.251483000000 | 1.518725000000  | 0.000711000000    |
| 200 | H         | 1.692453000000  | -1.348109000000 | 0.873721000000    |
| 201 | H         | 2.741983000000  | -0.182354000000 | 0.000405000000    |
| 202 | H         | 1.693049000000  | -1.348281000000 | -0.873351000000   |
| 203 |           |                 |                 |                   |
| 204 | (PA)(SA)  |                 |                 |                   |
| 205 | O         | -1.005914000000 | 0.403154000000  | 1.610699000000    |
| 206 | C         | -1.486129000000 | 0.676222000000  | 0.539193000000    |
| 207 | C         | -2.322753000000 | -0.329306000000 | -0.282938000000   |
| 208 | O         | -1.348604000000 | 1.846977000000  | -0.038944000000   |
| 209 | C         | -2.425936000000 | -1.712904000000 | 0.254374000000    |
| 210 | O         | -2.817045000000 | 0.080939000000  | -1.299843000000   |
| 211 | H         | -1.812655000000 | 1.804866000000  | -0.895497000000   |
| 212 | H         | -1.421069000000 | -2.140136000000 | 0.285030000000    |
| 213 | H         | -3.077092000000 | -2.307531000000 | -0.380046000000   |
| 214 | H         | -2.793568000000 | -1.682214000000 | 1.281292000000    |
| 215 | S         | 1.759457000000  | -0.253000000000 | -0.185414000000   |
| 216 | O         | 2.982595000000  | -0.924147000000 | -0.445006000000   |
| 217 | O         | 0.510544000000  | -0.689656000000 | -0.724520000000   |
| 218 | O         | 1.643895000000  | -0.116829000000 | 1.368753000000    |
| 219 | O         | 1.888827000000  | 1.257361000000  | -0.657499000000   |
| 220 | H         | 0.727931000000  | 0.153188000000  | 1.616744000000    |
| 221 | H         | 2.799663000000  | 1.553353000000  | -0.51379200000037 |
| 222 |           |                 |                 |                   |
| 223 | (PA)(DMA) |                 |                 |                   |
| 224 | O         | -2.219403000000 | 1.607154000000  | 0.315401000000    |
| 225 | C         | -1.270789000000 | 0.893588000000  | 0.119877000000    |
| 226 | C         | -1.515711000000 | -0.611130000000 | -0.162854000000   |
| 227 | O         | -0.027902000000 | 1.293966000000  | 0.130454000000    |

|     |               |                 |                 |                 |
|-----|---------------|-----------------|-----------------|-----------------|
| 228 | C             | -2.950482000000 | -1.034470000000 | -0.200581000000 |
| 229 | O             | -0.586614000000 | -1.358606000000 | -0.332849000000 |
| 230 | H             | 0.701552000000  | 0.580811000000  | -0.060577000000 |
| 231 | H             | -3.430668000000 | -0.774274000000 | 0.743833000000  |
| 232 | H             | -3.012552000000 | -2.102476000000 | -0.391541000000 |
| 233 | H             | -3.473785000000 | -0.467951000000 | -0.972771000000 |
| 234 | C             | 3.159155000000  | 0.604523000000  | -0.673671000000 |
| 235 | N             | 2.043719000000  | -0.235963000000 | -0.244526000000 |
| 236 | C             | 2.302587000000  | -0.903276000000 | 1.030525000000  |
| 237 | H             | 2.933832000000  | 1.048053000000  | -1.642677000000 |
| 238 | H             | 4.100971000000  | 0.048830000000  | -0.742353000000 |
| 239 | H             | 3.286725000000  | 1.411978000000  | 0.048770000000  |
| 240 | H             | 1.831704000000  | -0.935734000000 | -0.948180000000 |
| 241 | H             | 1.457854000000  | -1.546264000000 | 1.273045000000  |
| 242 | H             | 2.401012000000  | -0.145357000000 | 1.809595000000  |
| 243 | H             | 3.220109000000  | -1.501397000000 | 1.010712000000  |
| 244 |               |                 |                 |                 |
| 245 | (PA)(SA)(DMA) |                 |                 |                 |
| 246 | O             | 1.486909000000  | -1.099349000000 | 0.513036000000  |
| 247 | C             | 2.051918000000  | 0.017289000000  | 0.155646000000  |
| 248 | C             | 3.580391000000  | -0.124543000000 | -0.068395000000 |
| 249 | O             | 1.500663000000  | 1.085335000000  | -0.000941000000 |
| 250 | C             | 4.174775000000  | -1.490680000000 | 0.106115000000  |
| 251 | O             | 4.200126000000  | 0.854570000000  | -0.367140000000 |
| 252 | H             | -0.191819000000 | 1.551671000000  | 0.070740000000  |
| 253 | H             | 3.981393000000  | -1.850904000000 | 1.118046000000  |
| 254 | H             | 5.242872000000  | -1.444572000000 | -0.088478000000 |
| 255 | H             | 3.687481000000  | -2.193807000000 | -0.571791000000 |
| 256 | S             | -2.050258000000 | -1.153576000000 | -0.039337000000 |
| 257 | O             | -2.951852000000 | -2.112751000000 | 0.525310000000  |
| 258 | O             | -2.671473000000 | -0.033526000000 | -0.747800000000 |
| 259 | O             | -0.997376000000 | -0.645255000000 | 0.864408000000  |
| 260 | O             | -1.186706000000 | -1.945264000000 | -1.151594000000 |
| 261 | H             | 0.485180000000  | -0.978725000000 | 0.644110000000  |
| 262 | H             | -1.653238000000 | -2.769701000000 | -1.339546000000 |
| 263 | C             | -1.584338000000 | 2.441227000000  | 1.308045000000  |
| 264 | N             | -1.105756000000 | 2.032662000000  | -0.029324000000 |
| 265 | C             | -0.960473000000 | 3.147273000000  | -0.984728000000 |
| 266 | H             | -1.639612000000 | 1.550391000000  | 1.928887000000  |
| 267 | H             | -2.570033000000 | 2.891910000000  | 1.208391000000  |
| 268 | H             | -0.885646000000 | 3.159781000000  | 1.733093000000  |
| 269 | H             | -1.758900000000 | 1.296902000000  | -0.402332000000 |
| 270 | H             | -0.598035000000 | 2.752441000000  | -1.930758000000 |
| 271 | H             | -0.243255000000 | 3.864703000000  | -0.590296000000 |
| 272 | H             | -1.927938000000 | 3.625013000000  | -1.127734000000 |
| 273 |               |                 |                 |                 |

|     |            |                 |                 |                 |
|-----|------------|-----------------|-----------------|-----------------|
| 274 | MOA        |                 |                 |                 |
| 275 | O          | -1.590718000000 | 0.750797000000  | 0.887325000000  |
| 276 | O          | 2.383996000000  | -0.412451000000 | 0.268755000000  |
| 277 | O          | -1.966424000000 | -0.551894000000 | -0.893166000000 |
| 278 | O          | 1.057428000000  | 1.113283000000  | -0.690410000000 |
| 279 | C          | 0.070631000000  | -0.827405000000 | 0.346073000000  |
| 280 | C          | -1.268253000000 | -0.218772000000 | 0.018734000000  |
| 281 | C          | 1.190085000000  | 0.087102000000  | -0.092305000000 |
| 282 | H          | 0.166355000000  | -1.002849000000 | 1.418453000000  |
| 283 | H          | 0.171748000000  | -1.778092000000 | -0.175778000000 |
| 284 | H          | -2.428253000000 | 1.136242000000  | 0.592935000000  |
| 285 | H          | 3.061111000000  | 0.201276000000  | -0.050661000000 |
| 286 |            |                 |                 |                 |
| 287 | (MOA)(SA)  |                 |                 |                 |
| 288 | O          | 0.826071000000  | -0.713930000000 | 1.222963000000  |
| 289 | O          | 4.724225000000  | 0.316657000000  | -0.065885000000 |
| 290 | O          | 0.533749000000  | -0.762892000000 | -0.997858000000 |
| 291 | O          | 2.802486000000  | 1.462622000000  | 0.019628000000  |
| 292 | C          | 2.738665000000  | -0.941236000000 | -0.120652000000 |
| 293 | C          | 1.245943000000  | -0.797856000000 | -0.010574000000 |
| 294 | C          | 3.387549000000  | 0.422469000000  | -0.043267000000 |
| 295 | H          | 3.129064000000  | -1.562161000000 | 0.685727000000  |
| 296 | H          | 2.993967000000  | -1.394732000000 | -1.077680000000 |
| 297 | H          | -0.153542000000 | -0.587379000000 | 1.253539000000  |
| 298 | H          | 5.086876000000  | 1.213511000000  | -0.025434000000 |
| 299 | S          | -2.605209000000 | 0.071637000000  | 0.057601000000  |
| 300 | O          | -4.013943000000 | -0.077268000000 | -0.017688000000 |
| 301 | O          | -1.860268000000 | -0.445348000000 | 1.174529000000  |
| 302 | O          | -1.988649000000 | -0.449690000000 | -1.258412000000 |
| 303 | O          | -2.243896000000 | 1.617299000000  | 0.045391000000  |
| 304 | H          | -0.984138000000 | -0.575882000000 | -1.151493000000 |
| 305 | H          | -2.860022000000 | 2.080577000000  | -0.540661000000 |
| 306 |            |                 |                 |                 |
| 307 | (MOA)(DMA) |                 |                 |                 |
| 308 | O          | -0.584620000000 | 0.907456000000  | 0.919104000000  |
| 309 | O          | 3.077377000000  | 0.592306000000  | -1.114014000000 |
| 310 | O          | 0.192694000000  | -0.490678000000 | -0.644323000000 |
| 311 | O          | 3.388120000000  | -1.086706000000 | 0.328814000000  |
| 312 | C          | 1.746999000000  | 0.593154000000  | 0.832829000000  |
| 313 | C          | 0.372829000000  | 0.272756000000  | 0.275361000000  |
| 314 | C          | 2.819573000000  | -0.079298000000 | 0.020710000000  |
| 315 | H          | 1.877220000000  | 1.675614000000  | 0.831525000000  |
| 316 | H          | 1.796505000000  | 0.233331000000  | 1.859543000000  |
| 317 | H          | -1.484502000000 | 0.634370000000  | 0.492031000000  |
| 318 | H          | 3.728576000000  | 0.075268000000  | -1.608526000000 |
| 319 | C          | -2.868242000000 | -1.357204000000 | 0.271463000000  |

|     |                |                 |                 |                 |
|-----|----------------|-----------------|-----------------|-----------------|
| 320 | N              | -2.719026000000 | -0.017231000000 | -0.298865000000 |
| 321 | C              | -3.993159000000 | 0.685590000000  | -0.424065000000 |
| 322 | H              | -1.892438000000 | -1.841583000000 | 0.291417000000  |
| 323 | H              | -3.566809000000 | -1.977386000000 | -0.300479000000 |
| 324 | H              | -3.241572000000 | -1.267696000000 | 1.292881000000  |
| 325 | H              | -2.272161000000 | -0.105798000000 | -1.207999000000 |
| 326 | H              | -3.834090000000 | 1.658754000000  | -0.886944000000 |
| 327 | H              | -4.410933000000 | 0.843520000000  | 0.571185000000  |
| 328 | H              | -4.723181000000 | 0.123202000000  | -1.017016000000 |
| 329 |                |                 |                 |                 |
| 330 | (MOA)(SA)(DMA) |                 |                 |                 |
| 331 | O              | 4.553317000000  | -0.611393000000 | -0.151992000000 |
| 332 | O              | 0.538190000000  | -0.582781000000 | 1.111113000000  |
| 333 | O              | 2.770425000000  | 0.701604000000  | -0.334145000000 |
| 334 | O              | 0.301696000000  | -2.089006000000 | -0.530086000000 |
| 335 | C              | 2.480392000000  | -1.631977000000 | 0.264428000000  |
| 336 | C              | 3.238139000000  | -0.386632000000 | -0.098484000000 |
| 337 | C              | 0.974030000000  | -1.422765000000 | 0.274981000000  |
| 338 | H              | 2.756869000000  | -2.419802000000 | -0.435489000000 |
| 339 | H              | 2.810928000000  | -1.934265000000 | 1.261151000000  |
| 340 | H              | 4.985158000000  | 0.218620000000  | -0.400928000000 |
| 341 | H              | 1.009944000000  | 1.327952000000  | 0.152951000000  |
| 342 | S              | -2.531746000000 | -0.367792000000 | -0.157896000000 |
| 343 | O              | -3.940431000000 | -0.218097000000 | -0.079030000000 |
| 344 | O              | -1.797205000000 | 0.549844000000  | -1.031220000000 |
| 345 | O              | -1.922179000000 | -0.216217000000 | 1.265741000000  |
| 346 | O              | -2.179858000000 | -1.805412000000 | -0.573471000000 |
| 347 | H              | -0.894972000000 | -0.430535000000 | 1.228925000000  |
| 348 | H              | -1.137291000000 | -1.935580000000 | -0.583849000000 |
| 349 | C              | -0.206313000000 | 2.591589000000  | 1.253003000000  |
| 350 | N              | 0.217948000000  | 1.963231000000  | -0.015936000000 |
| 351 | C              | 0.576877000000  | 2.926118000000  | -1.075732000000 |
| 352 | H              | -0.373335000000 | 1.808341000000  | 1.987418000000  |
| 353 | H              | -1.133600000000 | 3.134177000000  | 1.079199000000  |
| 354 | H              | 0.571401000000  | 3.273097000000  | 1.593479000000  |
| 355 | H              | -0.568157000000 | 1.355977000000  | -0.373356000000 |
| 356 | H              | 0.864690000000  | 2.369365000000  | -1.964040000000 |
| 357 | H              | 1.409509000000  | 3.540322000000  | -0.738291000000 |
| 358 | H              | -0.289246000000 | 3.548062000000  | -1.293723000000 |
| 359 |                |                 |                 |                 |
| 360 | SUA            |                 |                 |                 |
| 361 | O              | 2.887412000000  | -0.822922000000 | 0.001614000000  |
| 362 | O              | -2.887410000000 | 0.822922000000  | 0.001835000000  |
| 363 | O              | 2.140057000000  | 1.282335000000  | -0.002368000000 |
| 364 | O              | -2.140056000000 | -1.282334000000 | -0.002890000000 |
| 365 | C              | 0.547525000000  | -0.523651000000 | 0.000751000000  |

|     |            |                 |                 |                 |
|-----|------------|-----------------|-----------------|-----------------|
| 366 | C          | -0.547526000000 | 0.523650000000  | 0.001034000000  |
| 367 | C          | 1.912757000000  | 0.104339000000  | -0.000178000000 |
| 368 | C          | -1.912757000000 | -0.104339000000 | -0.000171000000 |
| 369 | H          | 0.471032000000  | -1.181315000000 | -0.867748000000 |
| 370 | H          | 0.471952000000  | -1.181148000000 | 0.869435000000  |
| 371 | H          | -0.471047000000 | 1.181777000000  | -0.867114000000 |
| 372 | H          | -0.471942000000 | 1.180684000000  | 0.870069000000  |
| 373 | H          | 3.731880000000  | -0.350637000000 | 0.000624000000  |
| 374 | H          | -3.731880000000 | 0.350639000000  | 0.000597000000  |
| 375 |            |                 |                 |                 |
| 376 | (SUA)(SA)  |                 |                 |                 |
| 377 | C          | 2.917273000000  | -0.479860000000 | -0.075836000000 |
| 378 | C          | 2.144469000000  | 0.822701000000  | -0.014859000000 |
| 379 | C          | 4.395144000000  | -0.242408000000 | 0.068676000000  |
| 380 | C          | 0.664335000000  | 0.619200000000  | -0.136860000000 |
| 381 | H          | 2.743909000000  | -1.006026000000 | -1.016720000000 |
| 382 | H          | 2.602148000000  | -1.169908000000 | 0.709562000000  |
| 383 | H          | 2.455432000000  | 1.510313000000  | -0.804412000000 |
| 384 | H          | 2.333850000000  | 1.355459000000  | 0.919731000000  |
| 385 | H          | 6.027068000000  | -1.163330000000 | 0.110382000000  |
| 386 | H          | -0.984671000000 | 1.560910000000  | -0.177650000000 |
| 387 | O          | 5.091608000000  | -1.390222000000 | 0.010384000000  |
| 388 | O          | -0.017465000000 | 1.736458000000  | -0.096762000000 |
| 389 | O          | 4.915946000000  | 0.827525000000  | 0.219692000000  |
| 390 | O          | 0.159781000000  | -0.487679000000 | -0.259647000000 |
| 391 | S          | -3.219813000000 | -0.144083000000 | -0.049407000000 |
| 392 | O          | -4.535618000000 | -0.479857000000 | -0.459670000000 |
| 393 | O          | -2.654423000000 | 1.146151000000  | -0.337678000000 |
| 394 | O          | -3.128696000000 | -0.252526000000 | 1.534403000000  |
| 395 | O          | -2.256440000000 | -1.247816000000 | -0.535104000000 |
| 396 | H          | -3.695772000000 | -0.979250000000 | 1.831148000000  |
| 397 | H          | -1.289832000000 | -0.936916000000 | -0.433192000000 |
| 398 |            |                 |                 |                 |
| 399 | (SUA)(DMA) |                 |                 |                 |
| 400 | C          | 2.737407000000  | 1.474606000000  | -0.666647000000 |
| 401 | N          | 3.176863000000  | 0.132745000000  | -0.274258000000 |
| 402 | C          | 3.461498000000  | 0.051982000000  | 1.160056000000  |
| 403 | H          | 2.576451000000  | 1.505801000000  | -1.743866000000 |
| 404 | H          | 3.463268000000  | 2.246550000000  | -0.387800000000 |
| 405 | H          | 1.789501000000  | 1.680200000000  | -0.168404000000 |
| 406 | H          | 4.007316000000  | -0.118695000000 | -0.800227000000 |
| 407 | H          | 3.828258000000  | -0.944638000000 | 1.404893000000  |
| 408 | H          | 2.529835000000  | 0.223914000000  | 1.699375000000  |
| 409 | H          | 4.202102000000  | 0.794339000000  | 1.478242000000  |
| 410 | C          | -1.258461000000 | -1.563934000000 | -0.296965000000 |
| 411 | C          | -2.386063000000 | -0.878516000000 | 0.447605000000  |

|     |                |                 |                 |                 |
|-----|----------------|-----------------|-----------------|-----------------|
| 412 | C              | 0.066854000000  | -0.884343000000 | -0.036158000000 |
| 413 | C              | -2.622673000000 | 0.512254000000  | -0.078483000000 |
| 414 | H              | -1.431940000000 | -1.561432000000 | -1.373472000000 |
| 415 | H              | -1.162484000000 | -2.607306000000 | 0.011478000000  |
| 416 | H              | -2.173753000000 | -0.803721000000 | 1.514108000000  |
| 417 | H              | -3.324670000000 | -1.428157000000 | 0.339833000000  |
| 418 | H              | 1.901130000000  | -0.822006000000 | -0.596335000000 |
| 419 | H              | -3.528163000000 | 2.099575000000  | 0.326793000000  |
| 420 | O              | 1.038854000000  | -1.342081000000 | -0.798163000000 |
| 421 | O              | -3.413600000000 | 1.231739000000  | 0.738840000000  |
| 422 | O              | 0.209994000000  | -0.020515000000 | 0.801993000000  |
| 423 | O              | -2.198531000000 | 0.947617000000  | -1.112827000000 |
| 424 |                |                 |                 |                 |
| 425 | (SUA)(SA)(DMA) |                 |                 |                 |
| 426 | C              | -0.113872000000 | 1.922254000000  | -1.740065000000 |
| 427 | N              | -0.106252000000 | 1.786573000000  | -0.268478000000 |
| 428 | C              | 0.322915000000  | 3.010418000000  | 0.434195000000  |
| 429 | H              | -0.478019000000 | 0.992074000000  | -2.167953000000 |
| 430 | H              | 0.897477000000  | 2.138959000000  | -2.079946000000 |
| 431 | H              | -0.789317000000 | 2.732458000000  | -2.008587000000 |
| 432 | H              | 0.517343000000  | 1.016116000000  | -0.009310000000 |
| 433 | H              | 0.289337000000  | 2.828022000000  | 1.506099000000  |
| 434 | H              | -0.364885000000 | 3.815734000000  | 0.183534000000  |
| 435 | H              | 1.334247000000  | 3.267247000000  | 0.124149000000  |
| 436 | C              | 2.234117000000  | -1.968135000000 | -0.617916000000 |
| 437 | C              | 3.226285000000  | -1.392062000000 | 0.372140000000  |
| 438 | C              | 0.820084000000  | -1.516033000000 | -0.345975000000 |
| 439 | C              | 3.331127000000  | 0.105501000000  | 0.286829000000  |
| 440 | H              | 2.240479000000  | -3.059579000000 | -0.569846000000 |
| 441 | H              | 2.481529000000  | -1.698281000000 | -1.645279000000 |
| 442 | H              | 4.225897000000  | -1.803785000000 | 0.222399000000  |
| 443 | H              | 2.938754000000  | -1.627763000000 | 1.399502000000  |
| 444 | H              | -0.927743000000 | -1.328070000000 | -1.138364000000 |
| 445 | H              | 4.315783000000  | 1.544615000000  | 0.981231000000  |
| 446 | O              | -0.006199000000 | -1.772736000000 | -1.311749000000 |
| 447 | O              | 4.296205000000  | 0.582157000000  | 1.080043000000  |
| 448 | O              | 0.511736000000  | -0.953114000000 | 0.700052000000  |
| 449 | O              | 2.649443000000  | 0.826754000000  | -0.400940000000 |
| 450 | S              | -2.806863000000 | -0.210913000000 | 0.271512000000  |
| 451 | O              | -2.089786000000 | -0.448938000000 | -1.009049000000 |
| 452 | O              | -2.379476000000 | 1.098156000000  | 0.804768000000  |
| 453 | O              | -4.211828000000 | -0.435482000000 | 0.234705000000  |
| 454 | O              | -2.222776000000 | -1.300845000000 | 1.277541000000  |
| 455 | H              | -1.078121000000 | 1.503031000000  | 0.100912000000  |
| 456 | H              | -1.251673000000 | -1.191454000000 | 1.298402000000  |
| 457 |                |                 |                 |                 |

|     |                   |                 |                 |                 |
|-----|-------------------|-----------------|-----------------|-----------------|
| 458 | MA                |                 |                 |                 |
| 459 | O                 | 0.358117000000  | 1.674494000000  | -0.037114000000 |
| 460 | O                 | 2.076528000000  | -1.440064000000 | 0.346566000000  |
| 461 | O                 | -2.868724000000 | -0.374513000000 | -0.882334000000 |
| 462 | O                 | 2.739355000000  | 0.542161000000  | -0.453617000000 |
| 463 | O                 | -2.204875000000 | 0.179086000000  | 1.178118000000  |
| 464 | C                 | 0.483263000000  | 0.326685000000  | 0.317546000000  |
| 465 | C                 | -0.551729000000 | -0.506792000000 | -0.427954000000 |
| 466 | C                 | 1.886144000000  | -0.157479000000 | 0.018896000000  |
| 467 | C                 | -1.938320000000 | -0.177716000000 | 0.066668000000  |
| 468 | H                 | 0.314891000000  | 0.204330000000  | 1.394144000000  |
| 469 | H                 | -0.390573000000 | -1.572651000000 | -0.246583000000 |
| 470 | H                 | -0.488085000000 | -0.325128000000 | -1.500817000000 |
| 471 | H                 | 1.216963000000  | 1.973290000000  | -0.365622000000 |
| 472 | H                 | 2.995262000000  | -1.664363000000 | 0.139309000000  |
| 473 | H                 | -3.727804000000 | -0.172970000000 | -0.484302000000 |
| 474 |                   |                 |                 |                 |
| 475 | (MA) <sub>2</sub> |                 |                 |                 |
| 476 | O                 | -3.737435000000 | -0.484269000000 | -1.148023000000 |
| 477 | O                 | -1.377291000000 | -1.556683000000 | 1.299851000000  |
| 478 | O                 | -1.651081000000 | 1.535801000000  | -0.832320000000 |
| 479 | O                 | -1.289825000000 | -1.586192000000 | -0.938700000000 |
| 480 | O                 | -0.988068000000 | 1.870255000000  | 1.275167000000  |
| 481 | C                 | -3.210199000000 | -0.625645000000 | 0.130887000000  |
| 482 | C                 | -3.054489000000 | 0.719202000000  | 0.882975000000  |
| 483 | C                 | -1.864430000000 | -1.334188000000 | 0.098111000000  |
| 484 | C                 | -1.801487000000 | 1.449923000000  | 0.480306000000  |
| 485 | H                 | -3.902276000000 | -1.245261000000 | 0.705474000000  |
| 486 | H                 | -3.013927000000 | 0.565075000000  | 1.958319000000  |
| 487 | H                 | -3.925959000000 | 1.325159000000  | 0.629057000000  |
| 488 | H                 | -3.025257000000 | -0.205276000000 | -1.738372000000 |
| 489 | H                 | -0.420697000000 | -1.791503000000 | 1.225632000000  |
| 490 | H                 | -0.743412000000 | 1.867109000000  | -1.037556000000 |
| 491 | O                 | 3.737429000000  | -0.484655000000 | 1.147936000000  |
| 492 | O                 | 1.376960000000  | -1.556575000000 | -1.299836000000 |
| 493 | O                 | 1.651412000000  | 1.535851000000  | 0.832352000000  |
| 494 | O                 | 1.289575000000  | -1.586054000000 | 0.938721000000  |
| 495 | O                 | 0.988290000000  | 1.870239000000  | -1.275111000000 |
| 496 | C                 | 3.210100000000  | -0.625905000000 | -0.130947000000 |
| 497 | C                 | 3.054619000000  | 0.719003000000  | -0.882987000000 |
| 498 | C                 | 1.864186000000  | -1.334176000000 | -0.098120000000 |
| 499 | C                 | 1.801726000000  | 1.449881000000  | -0.480276000000 |
| 500 | H                 | 3.902016000000  | -1.245647000000 | -0.705590000000 |
| 501 | H                 | 3.014024000000  | 0.564928000000  | -1.958337000000 |
| 502 | H                 | 3.926187000000  | 1.324802000000  | -0.629036000000 |
| 503 | H                 | 3.025304000000  | -0.205670000000 | 1.738354000000  |



|     |           |                 |                 |                 |
|-----|-----------|-----------------|-----------------|-----------------|
| 504 | H         | 0.420326000000  | -1.791257000000 | -1.225585000000 |
| 505 | H         | 0.743787000000  | 1.867228000000  | 1.037632000000  |
| 506 |           |                 |                 |                 |
| 507 | (MA)(SA)  |                 |                 |                 |
| 508 | S         | 2.556304000000  | 0.254958000000  | 0.029749000000  |
| 509 | O         | 3.877986000000  | 0.752274000000  | -0.005973000000 |
| 510 | O         | 1.875659000000  | 0.059804000000  | 1.290030000000  |
| 511 | O         | 1.666855000000  | 1.198926000000  | -0.853669000000 |
| 512 | O         | 2.542748000000  | -1.098037000000 | -0.752243000000 |
| 513 | H         | 0.720879000000  | 1.145402000000  | -0.606852000000 |
| 514 | H         | 1.634077000000  | -1.477903000000 | -0.695593000000 |
| 515 | O         | -2.616828000000 | -1.405847000000 | -1.284021000000 |
| 516 | O         | -0.565242000000 | -0.981539000000 | 1.593825000000  |
| 517 | O         | -2.981182000000 | 2.370404000000  | -0.028227000000 |
| 518 | O         | -0.088248000000 | -1.607675000000 | -0.507744000000 |
| 519 | O         | -1.081044000000 | 1.262202000000  | -0.357232000000 |
| 520 | C         | -2.366846000000 | -1.235173000000 | 0.080177000000  |
| 521 | C         | -2.972516000000 | 0.081397000000  | 0.550943000000  |
| 522 | C         | -0.876902000000 | -1.289681000000 | 0.359773000000  |
| 523 | C         | -2.234703000000 | 1.270970000000  | -0.001027000000 |
| 524 | H         | -2.824815000000 | -2.046919000000 | 0.659841000000  |
| 525 | H         | -2.937793000000 | 0.156805000000  | 1.640753000000  |
| 526 | H         | -4.016358000000 | 0.131711000000  | 0.243400000000  |
| 527 | H         | -1.785323000000 | -1.658206000000 | -1.708352000000 |
| 528 | H         | 0.402755000000  | -0.799281000000 | 1.650112000000  |
| 529 | H         | -2.434125000000 | 3.099876000000  | -0.356454000000 |
| 530 |           |                 |                 |                 |
| 531 | (MA)(DMA) |                 |                 |                 |
| 532 | O         | -1.404276000000 | 1.704456000000  | -0.697223000000 |
| 533 | O         | 0.914338000000  | -0.588440000000 | 0.754055000000  |
| 534 | O         | -4.084322000000 | -1.156244000000 | -0.585883000000 |
| 535 | O         | 1.161442000000  | 1.074042000000  | -0.722603000000 |
| 536 | O         | -3.672926000000 | 0.268360000000  | 1.083842000000  |
| 537 | C         | -1.018955000000 | 0.653766000000  | 0.145951000000  |
| 538 | C         | -1.819700000000 | -0.598424000000 | -0.183916000000 |
| 539 | C         | 0.472334000000  | 0.395122000000  | 0.012407000000  |
| 540 | C         | -3.268557000000 | -0.415540000000 | 0.187399000000  |
| 541 | H         | -1.213426000000 | 0.920968000000  | 1.191212000000  |
| 542 | H         | -1.444979000000 | -1.449693000000 | 0.390567000000  |
| 543 | H         | -1.738932000000 | -0.836031000000 | -1.244842000000 |
| 544 | H         | -0.597916000000 | 2.022592000000  | -1.127535000000 |
| 545 | H         | 1.946099000000  | -0.687364000000 | 0.626554000000  |
| 546 | H         | -4.985677000000 | -1.006672000000 | -0.266826000000 |
| 547 | C         | 3.711393000000  | -0.968470000000 | -1.046888000000 |
| 548 | N         | 3.492234000000  | -0.742174000000 | 0.385219000000  |
| 549 | C         | 4.028909000000  | 0.551461000000  | 0.820020000000  |

|     |               |                 |                 |                 |
|-----|---------------|-----------------|-----------------|-----------------|
| 550 | H             | 3.152545000000  | -0.212201000000 | -1.598419000000 |
| 551 | H             | 3.335214000000  | -1.952970000000 | -1.323248000000 |
| 552 | H             | 4.770272000000  | -0.899371000000 | -1.316691000000 |
| 553 | H             | 3.932397000000  | -1.486634000000 | 0.916650000000  |
| 554 | H             | 3.480586000000  | 1.337691000000  | 0.300635000000  |
| 555 | H             | 5.095703000000  | 0.651593000000  | 0.595583000000  |
| 556 | H             | 3.875858000000  | 0.668422000000  | 1.892490000000  |
| 557 |               |                 |                 |                 |
| 558 | (MA)(SA)(DMA) |                 |                 |                 |
| 559 | S             | 2.648490000000  | -0.419342000000 | -0.329015000000 |
| 560 | O             | 2.338387000000  | -0.204107000000 | 1.189527000000  |
| 561 | O             | 4.033840000000  | -0.197422000000 | -0.539792000000 |
| 562 | O             | 2.305657000000  | -1.896178000000 | -0.578163000000 |
| 563 | O             | 1.696303000000  | 0.401382000000  | -1.070383000000 |
| 564 | H             | 1.273964000000  | -2.055647000000 | -0.439534000000 |
| 565 | H             | 0.492588000000  | 1.233826000000  | -0.217601000000 |
| 566 | O             | -2.432698000000 | 0.675475000000  | 1.402248000000  |
| 567 | O             | -3.510319000000 | -0.836688000000 | -1.636857000000 |
| 568 | O             | -0.141574000000 | -0.677067000000 | 1.414050000000  |
| 569 | O             | -2.153592000000 | 0.903317000000  | -1.299454000000 |
| 570 | O             | -0.136133000000 | -2.235398000000 | -0.194073000000 |
| 571 | C             | -2.928296000000 | -0.371300000000 | 0.608055000000  |
| 572 | C             | -2.202144000000 | -1.704127000000 | 0.864053000000  |
| 573 | C             | -2.807865000000 | -0.007780000000 | -0.864538000000 |
| 574 | C             | -0.699908000000 | -1.546994000000 | 0.669795000000  |
| 575 | H             | -3.993170000000 | -0.506980000000 | 0.815723000000  |
| 576 | H             | -2.584777000000 | -2.474557000000 | 0.199176000000  |
| 577 | H             | -2.388121000000 | -1.991211000000 | 1.900690000000  |
| 578 | H             | -1.590696000000 | 0.354678000000  | 1.776013000000  |
| 579 | H             | -3.347892000000 | -0.597614000000 | -2.561164000000 |
| 580 | H             | 1.353861000000  | -0.451054000000 | 1.345833000000  |
| 581 | C             | 0.512081000000  | 2.509937000000  | 1.410966000000  |
| 582 | N             | -0.046163000000 | 2.064143000000  | 0.116726000000  |
| 583 | C             | 0.053840000000  | 3.079066000000  | -0.955975000000 |
| 584 | H             | 1.574076000000  | 2.707646000000  | 1.279078000000  |
| 585 | H             | 0.384001000000  | 1.715620000000  | 2.141797000000  |
| 586 | H             | -0.007800000000 | 3.410733000000  | 1.731634000000  |
| 587 | H             | -1.024397000000 | 1.760469000000  | 0.215729000000  |
| 588 | H             | 1.107116000000  | 3.292717000000  | -1.124858000000 |
| 589 | H             | -0.476384000000 | 3.978937000000  | -0.650227000000 |
| 590 | H             | -0.390303000000 | 2.663582000000  | -1.856090000000 |
| 591 |               |                 |                 |                 |
| 592 | TA            |                 |                 |                 |
| 593 | O             | 0.164037000000  | 1.468084000000  | 0.793542000000  |
| 594 | O             | -0.164215000000 | -1.468158000000 | 0.793178000000  |
| 595 | O             | 2.256164000000  | -0.659849000000 | -1.167300000000 |

|     |           |                 |                 |                 |
|-----|-----------|-----------------|-----------------|-----------------|
| 596 | O         | -2.256037000000 | 0.660299000000  | -1.167053000000 |
| 597 | O         | 2.610841000000  | 0.399912000000  | 0.775928000000  |
| 598 | O         | -2.610781000000 | -0.400335000000 | 0.775691000000  |
| 599 | C         | 0.468021000000  | 0.610280000000  | -0.263993000000 |
| 600 | C         | -0.467975000000 | -0.610191000000 | -0.264220000000 |
| 601 | C         | 1.896236000000  | 0.118978000000  | -0.143558000000 |
| 602 | C         | -1.896204000000 | -0.118986000000 | -0.143720000000 |
| 603 | H         | 0.357324000000  | 1.140218000000  | -1.215308000000 |
| 604 | H         | -0.357266000000 | -1.139932000000 | -1.215646000000 |
| 605 | H         | 0.871731000000  | 1.388898000000  | 1.448484000000  |
| 606 | H         | -0.872440000000 | -1.389644000000 | 1.447612000000  |
| 607 | H         | 3.158944000000  | -0.967702000000 | -1.002217000000 |
| 608 | H         | -3.158832000000 | 0.968059000000  | -1.001874000000 |
| 609 |           |                 |                 |                 |
| 610 | (TA)(SA)  |                 |                 |                 |
| 611 | O         | 2.241924000000  | 1.611742000000  | -0.120935000000 |
| 612 | O         | 2.194938000000  | -0.751900000000 | 1.568094000000  |
| 613 | O         | 4.545224000000  | -1.063301000000 | -0.656774000000 |
| 614 | O         | -0.040895000000 | -0.571563000000 | -1.191062000000 |
| 615 | O         | 4.807990000000  | 0.983712000000  | 0.219125000000  |
| 616 | O         | -0.318857000000 | -0.067524000000 | 0.977743000000  |
| 617 | C         | 2.637908000000  | 0.342286000000  | -0.546098000000 |
| 618 | C         | 1.842954000000  | -0.728709000000 | 0.221015000000  |
| 619 | C         | 4.115558000000  | 0.141014000000  | -0.277077000000 |
| 620 | C         | 0.369590000000  | -0.426551000000 | 0.039592000000  |
| 621 | H         | 2.458766000000  | 0.221503000000  | -1.620163000000 |
| 622 | H         | 2.052475000000  | -1.708548000000 | -0.213965000000 |
| 623 | H         | 3.014490000000  | 2.045404000000  | 0.268529000000  |
| 624 | H         | 1.648340000000  | -0.104697000000 | 2.032301000000  |
| 625 | H         | 5.484447000000  | -1.131013000000 | -0.431599000000 |
| 626 | H         | -1.000894000000 | -0.348884000000 | -1.271792000000 |
| 627 | S         | -3.537270000000 | 0.159653000000  | -0.145026000000 |
| 628 | O         | -4.777519000000 | 0.838204000000  | -0.253269000000 |
| 629 | O         | -2.663389000000 | 0.018952000000  | -1.278502000000 |
| 630 | O         | -2.752178000000 | 0.764534000000  | 1.040836000000  |
| 631 | O         | -3.801182000000 | -1.336698000000 | 0.317630000000  |
| 632 | H         | -1.791139000000 | 0.443229000000  | 1.023335000000  |
| 633 | H         | -4.554679000000 | -1.348947000000 | 0.926087000000  |
| 634 |           |                 |                 |                 |
| 635 | (TA)(DMA) |                 |                 |                 |
| 636 | O         | 1.113008000000  | -1.492222000000 | -0.444891000000 |
| 637 | O         | 1.410419000000  | 1.359041000000  | -1.140931000000 |
| 638 | O         | 3.610354000000  | 0.541167000000  | 1.099711000000  |
| 639 | O         | -1.089464000000 | 0.221345000000  | 1.127894000000  |
| 640 | O         | 3.728250000000  | -0.947796000000 | -0.569877000000 |
| 641 | O         | -1.184482000000 | 0.888393000000  | -1.009231000000 |

|     |               |                 |                 |                 |
|-----|---------------|-----------------|-----------------|-----------------|
| 642 | C             | 1.588500000000  | -0.485708000000 | 0.400033000000  |
| 643 | C             | 0.933329000000  | 0.866461000000  | 0.076374000000  |
| 644 | C             | 3.087755000000  | -0.343118000000 | 0.242837000000  |
| 645 | C             | -0.571391000000 | 0.661233000000  | 0.012167000000  |
| 646 | H             | 1.361722000000  | -0.745339000000 | 1.437685000000  |
| 647 | H             | 1.159290000000  | 1.570495000000  | 0.883771000000  |
| 648 | H             | 1.790551000000  | -1.650742000000 | -1.116409000000 |
| 649 | H             | 0.662103000000  | 1.345425000000  | -1.755801000000 |
| 650 | H             | 4.554848000000  | 0.616413000000  | 0.902572000000  |
| 651 | H             | -2.102281000000 | -0.000027000000 | 0.980506000000  |
| 652 | C             | -4.274192000000 | 0.754459000000  | 0.095954000000  |
| 653 | N             | -3.556804000000 | -0.413563000000 | 0.615697000000  |
| 654 | C             | -3.399861000000 | -1.458182000000 | -0.402986000000 |
| 655 | H             | -4.409521000000 | 1.485267000000  | 0.892626000000  |
| 656 | H             | -5.252796000000 | 0.485726000000  | -0.315181000000 |
| 657 | H             | -3.666561000000 | 1.202853000000  | -0.690137000000 |
| 658 | H             | -4.056986000000 | -0.792397000000 | 1.413459000000  |
| 659 | H             | -2.882356000000 | -2.313718000000 | 0.029725000000  |
| 660 | H             | -2.787514000000 | -1.055621000000 | -1.210166000000 |
| 661 | H             | -4.362381000000 | -1.783701000000 | -0.810214000000 |
| 662 |               |                 |                 |                 |
| 663 | (TA)(SA)(DMA) |                 |                 |                 |
| 664 | O             | 2.333570000000  | -1.297011000000 | 1.472544000000  |
| 665 | O             | 2.250533000000  | 1.230034000000  | 0.040466000000  |
| 666 | O             | -0.089407000000 | -0.661177000000 | -1.055375000000 |
| 667 | O             | 4.594345000000  | -1.277412000000 | -0.906843000000 |
| 668 | O             | -0.237308000000 | -0.942701000000 | 1.161491000000  |
| 669 | O             | 4.785479000000  | 0.598763000000  | 0.305221000000  |
| 670 | C             | 1.893771000000  | -1.171541000000 | 0.151898000000  |
| 671 | C             | 2.629418000000  | -0.010787000000 | -0.519859000000 |
| 672 | C             | 0.386582000000  | -0.915268000000 | 0.076742000000  |
| 673 | C             | 4.121394000000  | -0.178623000000 | -0.322806000000 |
| 674 | H             | 2.103230000000  | -2.083092000000 | -0.419868000000 |
| 675 | H             | 2.395736000000  | -0.010870000000 | -1.586456000000 |
| 676 | H             | 1.536852000000  | -1.287071000000 | 2.023704000000  |
| 677 | H             | 2.980018000000  | 1.509322000000  | 0.616112000000  |
| 678 | H             | -1.574799000000 | -0.878906000000 | -1.281346000000 |
| 679 | H             | 5.537045000000  | -1.347598000000 | -0.697215000000 |
| 680 | S             | -3.312857000000 | -0.565783000000 | -0.091672000000 |
| 681 | O             | -4.703830000000 | -0.790913000000 | -0.239321000000 |
| 682 | O             | -2.586650000000 | -1.032820000000 | -1.380950000000 |
| 683 | O             | -2.846614000000 | 0.777829000000  | 0.217781000000  |
| 684 | O             | -2.766984000000 | -1.513440000000 | 1.017115000000  |
| 685 | H             | -1.099132000000 | 1.191393000000  | 0.263835000000  |
| 686 | H             | -1.787897000000 | -1.305960000000 | 1.158660000000  |
| 687 | C             | -0.667105000000 | 2.476784000000  | -1.258602000000 |

|     |          |                 |                 |                 |
|-----|----------|-----------------|-----------------|-----------------|
| 688 | N        | -0.481655000000 | 2.012010000000  | 0.135693000000  |
| 689 | C        | -0.869268000000 | 3.012446000000  | 1.153305000000  |
| 690 | H        | -0.350318000000 | 1.675492000000  | -1.921956000000 |
| 691 | H        | -0.067033000000 | 3.370530000000  | -1.418404000000 |
| 692 | H        | -1.724271000000 | 2.686513000000  | -1.406776000000 |
| 693 | H        | 0.496470000000  | 1.709193000000  | 0.260478000000  |
| 694 | H        | -0.702802000000 | 2.588400000000  | 2.140675000000  |
| 695 | H        | -1.927122000000 | 3.231203000000  | 1.024300000000  |
| 696 | H        | -0.272506000000 | 3.912616000000  | 1.020068000000  |
| 697 |          |                 |                 |                 |
| 698 | GA       |                 |                 |                 |
| 699 | O        | 3.612207000000  | -0.668743000000 | -0.000825000000 |
| 700 | O        | -3.612208000000 | -0.668744000000 | 0.000334000000  |
| 701 | O        | 2.575672000000  | 1.306993000000  | 0.000870000000  |
| 702 | O        | -2.575677000000 | 1.306992000000  | -0.000729000000 |
| 703 | C        | 0.000002000000  | 0.153787000000  | -0.000166000000 |
| 704 | C        | 1.252422000000  | -0.706326000000 | 0.000239000000  |
| 705 | C        | -1.252418000000 | -0.706323000000 | 0.000282000000  |
| 706 | C        | 2.515502000000  | 0.112119000000  | 0.000113000000  |
| 707 | C        | -2.515502000000 | 0.112119000000  | -0.000122000000 |
| 708 | H        | -0.000041000000 | 0.809823000000  | -0.869194000000 |
| 709 | H        | 0.000049000000  | 0.810670000000  | 0.868218000000  |
| 710 | H        | 1.289024000000  | -1.363740000000 | 0.871766000000  |
| 711 | H        | 1.289188000000  | -1.364589000000 | -0.870615000000 |
| 712 | H        | -1.289078000000 | -1.363746000000 | 0.871787000000  |
| 713 | H        | -1.289129000000 | -1.364584000000 | -0.870590000000 |
| 714 | H        | 4.380929000000  | -0.084042000000 | -0.000629000000 |
| 715 | H        | -4.380933000000 | -0.084045000000 | -0.000035000000 |
| 716 |          |                 |                 |                 |
| 717 | (GA)(SA) |                 |                 |                 |
| 718 | O        | -0.656223000000 | 2.115748000000  | -0.668822000000 |
| 719 | O        | 4.286935000000  | -2.002511000000 | -0.769421000000 |
| 720 | O        | 0.030471000000  | 0.401616000000  | 0.584544000000  |
| 721 | O        | 4.820376000000  | -0.661209000000 | 0.931928000000  |
| 722 | C        | 2.739409000000  | 1.146044000000  | 0.404686000000  |
| 723 | C        | 1.627796000000  | 2.044734000000  | -0.113127000000 |
| 724 | C        | 2.963452000000  | -0.069451000000 | -0.481277000000 |
| 725 | C        | 0.257908000000  | 1.431032000000  | -0.032794000000 |
| 726 | C        | 4.117058000000  | -0.909370000000 | -0.004604000000 |
| 727 | H        | 2.509564000000  | 0.817139000000  | 1.416827000000  |
| 728 | H        | 3.662411000000  | 1.720339000000  | 0.464529000000  |
| 729 | H        | 1.573734000000  | 2.970691000000  | 0.463566000000  |
| 730 | H        | 1.792279000000  | 2.347850000000  | -1.148206000000 |
| 731 | H        | 3.177222000000  | 0.220293000000  | -1.513036000000 |
| 732 | H        | 2.079700000000  | -0.707515000000 | -0.516512000000 |
| 733 | H        | -1.541217000000 | 1.685318000000  | -0.596137000000 |

|     |               |                 |                 |                 |
|-----|---------------|-----------------|-----------------|-----------------|
| 734 | H             | 5.041640000000  | -2.488253000000 | -0.412744000000 |
| 735 | S             | -3.229186000000 | -0.458521000000 | 0.080913000000  |
| 736 | O             | -4.490633000000 | -0.826448000000 | 0.598434000000  |
| 737 | O             | -3.013401000000 | 0.850348000000  | -0.456010000000 |
| 738 | O             | -2.157331000000 | -0.761459000000 | 1.131668000000  |
| 739 | O             | -2.866015000000 | -1.426854000000 | -1.110909000000 |
| 740 | H             | -1.277032000000 | -0.293309000000 | 0.908243000000  |
| 741 | H             | -3.218492000000 | -2.307999000000 | -0.929737000000 |
| 742 |               |                 |                 |                 |
| 743 | (GA)(DMA)     |                 |                 |                 |
| 744 | O             | -5.335183000000 | -0.305235000000 | 0.103364000000  |
| 745 | O             | 1.827838000000  | -1.247086000000 | 0.234569000000  |
| 746 | O             | -4.046386000000 | 1.470403000000  | -0.296951000000 |
| 747 | O             | 1.038455000000  | 0.739468000000  | -0.404405000000 |
| 748 | C             | -1.642703000000 | -0.000368000000 | -0.042846000000 |
| 749 | C             | -3.000641000000 | -0.659273000000 | 0.129933000000  |
| 750 | C             | -0.517421000000 | -0.999377000000 | 0.165066000000  |
| 751 | C             | -4.142664000000 | 0.303518000000  | -0.049714000000 |
| 752 | C             | 0.852630000000  | -0.395910000000 | -0.034032000000 |
| 753 | H             | -1.540682000000 | 0.826004000000  | 0.659133000000  |
| 754 | H             | -1.566801000000 | 0.442640000000  | -1.034538000000 |
| 755 | H             | -3.145973000000 | -1.473728000000 | -0.583321000000 |
| 756 | H             | -3.108081000000 | -1.109681000000 | 1.119454000000  |
| 757 | H             | -0.599796000000 | -1.841353000000 | -0.526685000000 |
| 758 | H             | -0.544831000000 | -1.434726000000 | 1.166036000000  |
| 759 | H             | -6.016698000000 | 0.366992000000  | -0.024619000000 |
| 760 | H             | 2.712986000000  | -0.779637000000 | 0.058231000000  |
| 761 | C             | 4.037838000000  | 1.105349000000  | 0.947107000000  |
| 762 | N             | 3.991680000000  | 0.241656000000  | -0.229870000000 |
| 763 | C             | 5.304795000000  | -0.261423000000 | -0.611865000000 |
| 764 | H             | 3.041045000000  | 1.499070000000  | 1.133133000000  |
| 765 | H             | 4.737338000000  | 1.938279000000  | 0.826043000000  |
| 766 | H             | 4.352155000000  | 0.516273000000  | 1.808421000000  |
| 767 | H             | 3.569801000000  | 0.759554000000  | -0.993490000000 |
| 768 | H             | 5.223862000000  | -0.856469000000 | -1.518684000000 |
| 769 | H             | 5.684657000000  | -0.901696000000 | 0.183452000000  |
| 770 | H             | 6.030461000000  | 0.541392000000  | -0.777982000000 |
| 771 |               |                 |                 |                 |
| 772 | (GA)(SA)(DMA) |                 |                 |                 |
| 773 | C             | 2.497922000000  | -0.573450000000 | -1.499054000000 |
| 774 | C             | 3.176320000000  | -1.081179000000 | -0.218490000000 |
| 775 | C             | 2.257316000000  | -1.910291000000 | 0.671605000000  |
| 776 | C             | 1.729057000000  | 0.718960000000  | -1.322624000000 |
| 777 | C             | 1.194450000000  | -1.088935000000 | 1.345216000000  |
| 778 | O             | 0.434489000000  | 0.706220000000  | -1.614685000000 |
| 779 | O             | 2.250295000000  | 1.754722000000  | -0.975594000000 |

|     |   |                 |                 |                 |
|-----|---|-----------------|-----------------|-----------------|
| 780 | O | 0.271574000000  | -1.820609000000 | 1.953445000000  |
| 781 | O | 1.183837000000  | 0.121797000000  | 1.347383000000  |
| 782 | H | 3.266687000000  | -0.342171000000 | -2.240008000000 |
| 783 | H | 1.849749000000  | -1.343734000000 | -1.921563000000 |
| 784 | H | 4.022608000000  | -1.705913000000 | -0.506819000000 |
| 785 | H | 3.573288000000  | -0.229053000000 | 0.336233000000  |
| 786 | H | 1.749116000000  | -2.698177000000 | 0.110038000000  |
| 787 | H | 2.823947000000  | -2.409863000000 | 1.462991000000  |
| 788 | H | 0.021146000000  | -0.204201000000 | -1.512719000000 |
| 789 | H | -0.486889000000 | -1.237551000000 | 2.139424000000  |
| 790 | S | -1.989183000000 | -0.992745000000 | -0.253692000000 |
| 791 | O | -2.949199000000 | -2.028598000000 | -0.017012000000 |
| 792 | O | -0.763464000000 | -1.446836000000 | -0.933602000000 |
| 793 | O | -2.667003000000 | 0.055336000000  | -1.295082000000 |
| 794 | O | -1.694409000000 | -0.108582000000 | 0.877395000000  |
| 795 | H | -3.164374000000 | -0.464125000000 | -1.940765000000 |
| 796 | H | -0.480930000000 | 1.278641000000  | 0.634901000000  |
| 797 | C | -1.334381000000 | 2.905685000000  | -0.267545000000 |
| 798 | N | -0.260929000000 | 2.287256000000  | 0.541330000000  |
| 799 | C | -0.125670000000 | 2.855452000000  | 1.898030000000  |
| 800 | H | -1.336698000000 | 2.430936000000  | -1.244608000000 |
| 801 | H | -1.147929000000 | 3.974644000000  | -0.352872000000 |
| 802 | H | -2.283814000000 | 2.718214000000  | 0.229764000000  |
| 803 | H | 0.640831000000  | 2.326828000000  | 0.039795000000  |
| 804 | H | 0.677715000000  | 2.329937000000  | 2.406701000000  |
| 805 | H | -1.065037000000 | 2.705261000000  | 2.426844000000  |
| 806 | H | 0.094955000000  | 3.918391000000  | 1.821627000000  |

## 807 Reference

- 808 1 Q. Yu, J. Chen, S. Cheng, W. Qin, Y. Zhang, Y. Sun and M. Ahmad, *Sci. Total*  
809 *Environ.*, 2021, **763**, 142964.
- 810 2 X. D. Li, Z. Yang, P. Fu, J. Yu, Y. C. Lang, D. Liu, K. Ono and K. Kawamura,  
811 *Environ. Sci. Pollut. Res. Int.*, 2015, **22**, 12902-12918.
- 812 3 K. Kawamura, E. Tachibana, K. Okuzawa, S. G. Aggarwal, Y. Kanaya and Z. F.  
813 Wang, *Atmos. Chem. Phys.*, 2013, **13**, 8285-8302.
- 814 4 D. K. Deshmukh, K. Kawamura and M. K. Deb, *Chemosphere*, 2016, **161**, 27-42.
- 815 5 K. Kawamura, H. Kasukabe and L. A. Barrie, *Atmos. Environ.*, 1996, **30**, 1709-  
816 1722.
- 817 6 J. M. Mattila, P. Brophy, J. Kirkland, S. Hall, K. Ullmann, E. V. Fischer, S. Brown,  
818 E. McDuffie, A. Tevlin and D. K. Farmer, *Atmos. Chem. Phys.*, 2018, **18**, 12315-  
819 12327.
- 820 7 I. Khan, P. Brimblecombe and S. L. Clegg, *J. Atmos. Chem.*, 1995, **22**, 285-302.
- 821 8 S. H. Yalkowsky, Y. He and P. Jain, *Handbook of aqueous solubility data*, CRC  
822 press, 2016.
- 823 9 R. M. C. Dawson, D. C. Elliott, W. H. Elliott and K. M. Jones, *Data for biochemical*  
824 *research*, Clarendon Press, 2002.

- 825 10 M. Bilde, K. Barsanti, M. Booth, C. D. Cappa, N. M. Donahue, E. U. Emanuelsson,  
826 G. McFiggans, U. K. Krieger, C. Marcolli, D. Topping, P. Ziemann, M. Barley, S.  
827 Clegg, B. Dennis-Smith, M. Hallquist, A. M. Hallquist, A. Khlystov, M.  
828 Kulmala, D. Mogensen, C. J. Percival, F. Pope, J. P. Reid, M. A. Ribeiro da Silva,  
829 T. Rosenoern, K. Salo, V. P. Soonsin, T. Yli-Juuti, N. L. Prisle, J. Pagels, J. Rarey,  
830 A. A. Zardini and I. Riipinen, *Chem. Rev.*, 2015, **115**, 4115-4156.
- 831 11 R. M. Stephenson and S. Malanowski, in *Handbook of the Thermodynamics of*  
832 *Organic Compounds*, eds. R. M. Stephenson and S. Malanowski, Springer  
833 Netherlands, Dordrecht, 1987, 1-471, DOI: 10.1007/978-94-009-3173-2\_1.
